# Supplementary material for: A simple but effective fluorescent probe for the detection of bisulfite
Source: Royal Society of Chemistry journal article supplement (doi:10.1039/c7nj00041c), 2017-01-01
Supplement: c7nj00041c1.pdf [file c7nj00041c1.pdf]

Electronic Supplementary Information

**A simple but effective fluorescent probe for the detection of bisulfite**

Jing Luo, Guangjie Song, Xujiao Xing, Shili Shen, Yanqing Ge, Xiaoqun Cao\*

*School of Chemistry and Pharmaceutical Engineering, Taishan Medical University,  
Tai'an 271000, PR China.*

\*Correspondence to: Prof. Xiaoqun Cao

Tel: 0086-538-6236195.

Email address: xqcao@tsmc.edu.cn

### Calculation of the detection limit (LOD)

$$\text{LOD} = 3\sigma/k$$

Where,  $\sigma$  is the standard deviation of the blank solution and  $k$  is the slope of the linear calibration plot between the fluorescence emission intensity and the concentration of hypochlorite.

The concentration of PML and  $\text{HSO}_3^-$  were the same and we used the formula to calculate the rate constant. Formula:  $\text{dx}/\text{dt} = k(c-x)^2$ ,  $x$  is the concentration of the reactants consumed when the time was  $t$ ,  $c$  is the initial concentration,  $k$  is the rate constant. Integral to get a new formula  $x/c(c-x) = kt$ . We measured the fluorescence intensity and the fluorescence intensity is proportional to the concentration. Therefore, as long as measured by the experiment of when the value of  $x$  at different time  $t$ , it is a straight line which proved that it is a second-order reaction. The rate constant  $k$  can be calculated from formula.  $k = 1.457 \times 10^5 \text{ M}^{-1} \text{ min}^{-1}$ .

AV300 1H 20160527 LJ-1-41-13

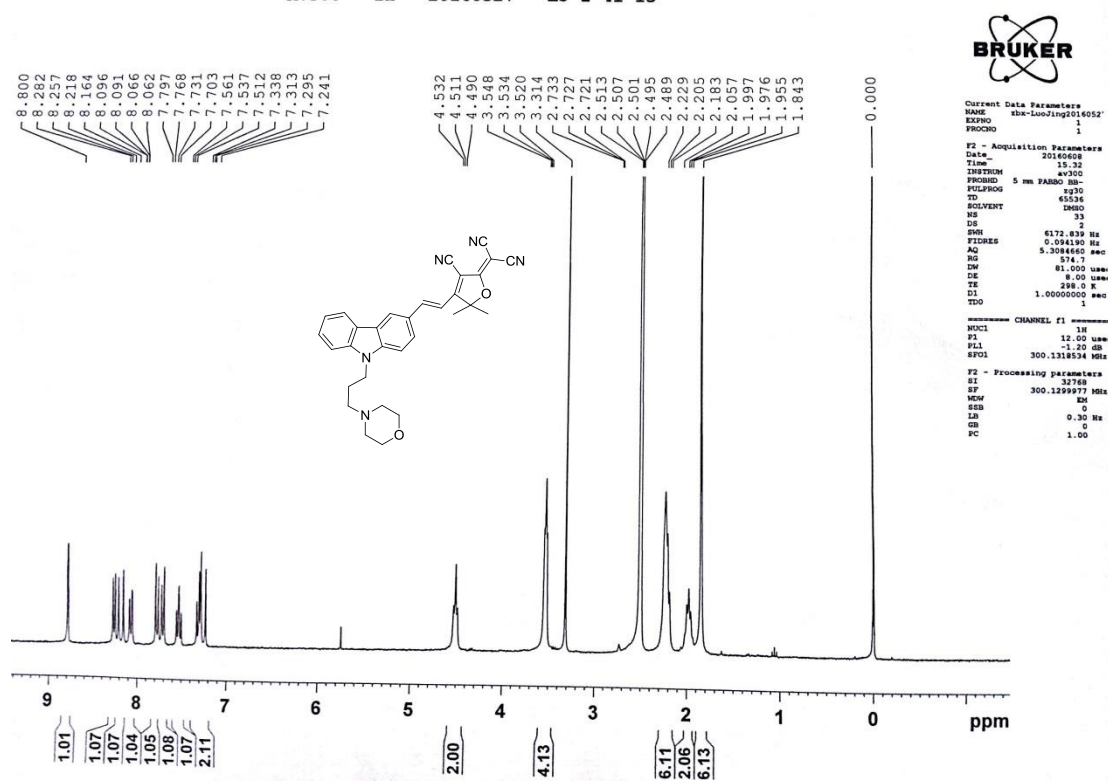

|               |              |             |        |                 |              |                        |                       |
|---------------|--------------|-------------|--------|-----------------|--------------|------------------------|-----------------------|
| Sample Name   | LJ-1-41-13   | Position    | Vial 5 | Instrument Name | Instrument 1 | User Name              |                       |
| Inj Vol       | -1           | InjPosition |        | SampleType      | Sample       | IRM Calibration Status | Success               |
| Data Filename | LJ-1-41-13.d | ACQ Method  | 0103.m | Comment         |              | Acquired Time          | 10/11/2016 1:19:45 PM |

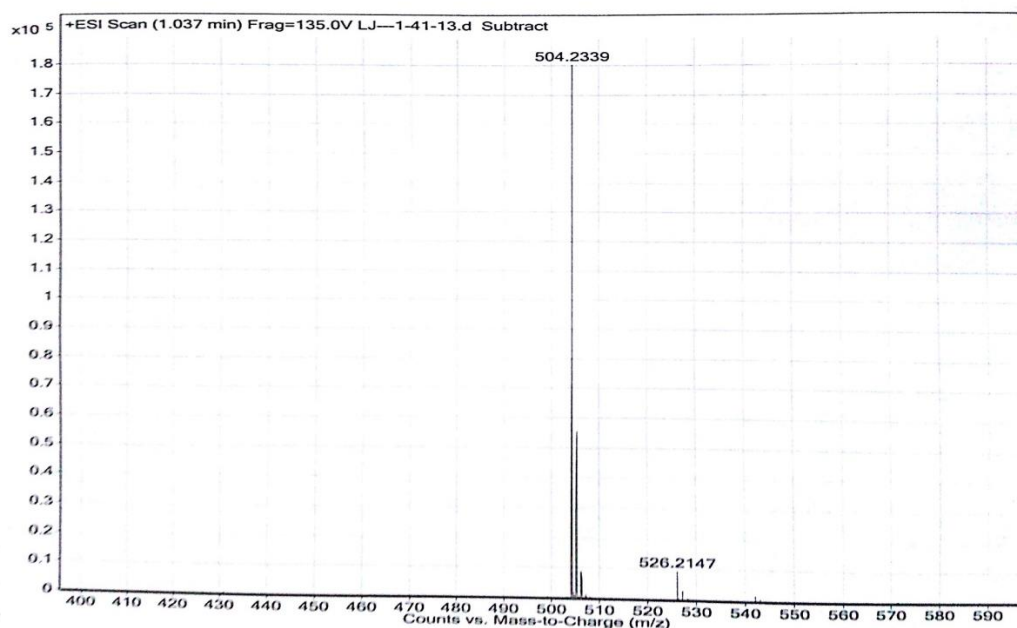

**Fig. S3** MS spectrum of probe **PML**.

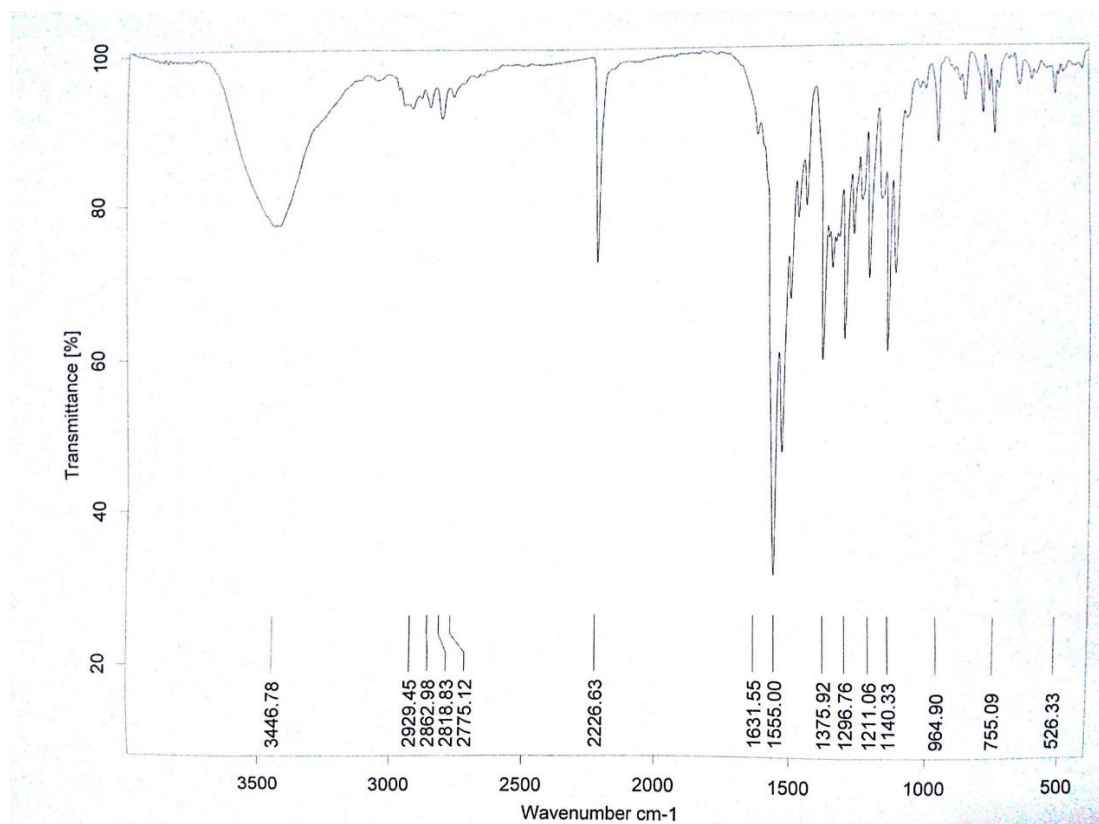

**Fig. S4** IR spectrum of probe **PML**.

AV300 1H 20160516 LJ-1-35-18

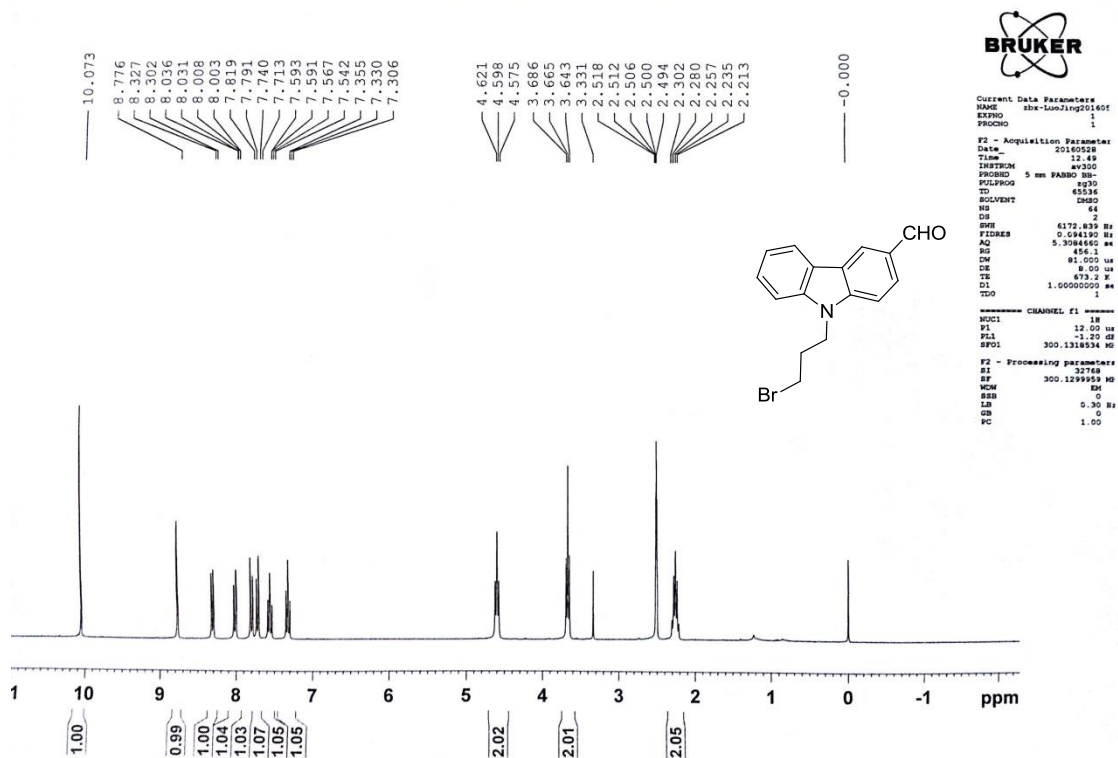

Fig. S5  $^1\text{H}$  NMR spectrum of 9-(3-bromopropyl)-9H-carbazole-3-carbaldehyde.

|               |              |             |             |                 |                                   |                        |             |
|---------------|--------------|-------------|-------------|-----------------|-----------------------------------|------------------------|-------------|
| Sample Name   | Unavailable  | Position    | Unavailable | Instrument Name | Unavailable                       | User Name              | Unavailable |
| Inj Vol       | Unavailable  | InjPosition | Unavailable | SampleType      | Unavailable                       | IRM Calibration Status | Success     |
| Data Filename | LJ-1-41-13.d | ACQ Method  |             | Comment         | Sample information is unavailable | Acquired Time          | Unavailable |

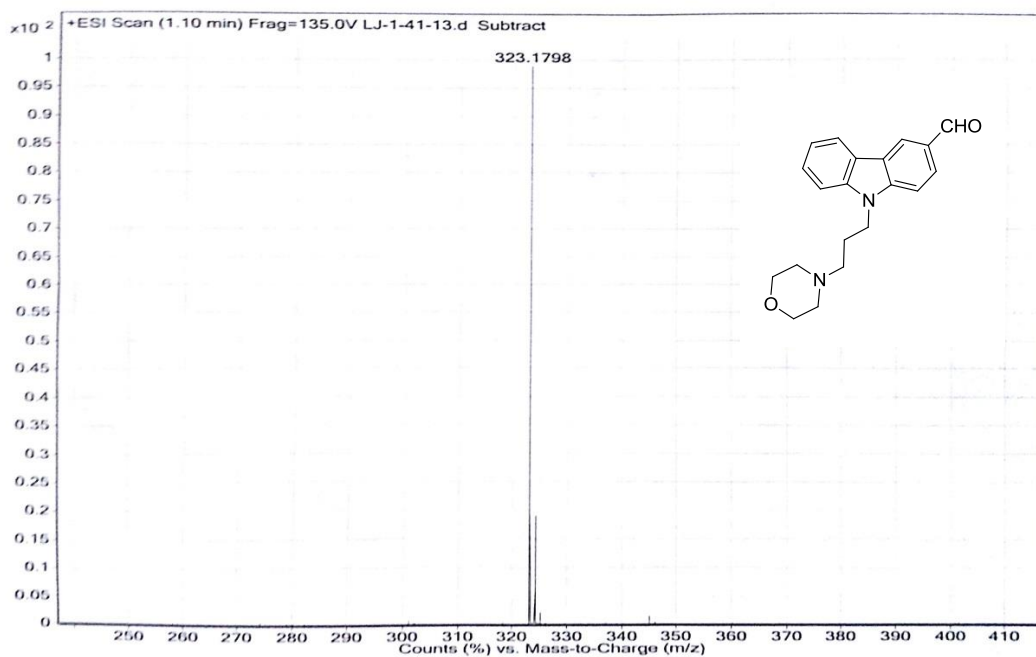

Fig. S6 MS spectrum of compound 4

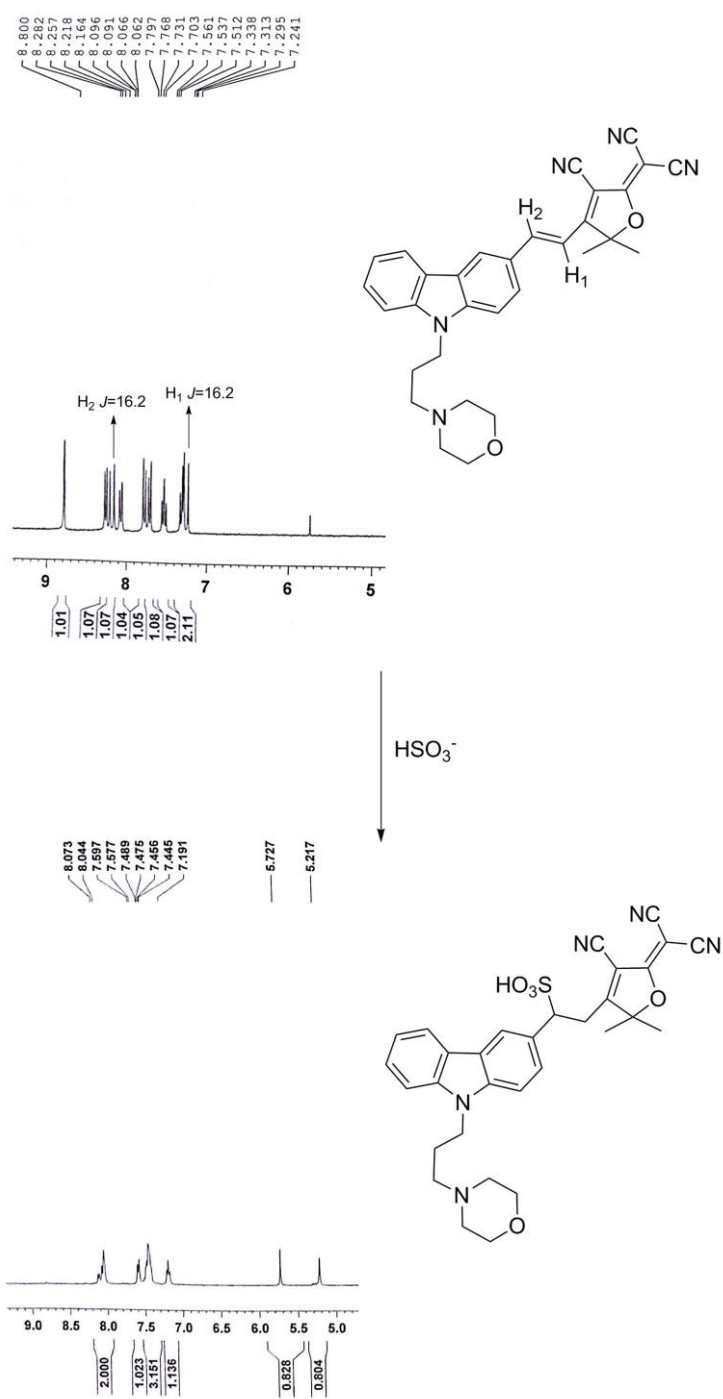

**Fig. S7**  $^1\text{H}$  NMR titration process of PML and  $\text{HSO}_3^-$

**Table. S1** Comparison of fluorescent probes for  $\text{HSO}_3^-/\text{SO}_3^{2-}$ .

| Probe structures                                                                    | LOD/ $\mu\text{M}$ | $\lambda_{\text{ex}}/\text{nm}$ | $\lambda_{\text{em}}/\text{nm}$ | Response time | Ref.      |
|-------------------------------------------------------------------------------------|--------------------|---------------------------------|---------------------------------|---------------|-----------|
| 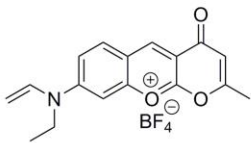   | 0.61               | 465 nm                          | 510/560 nm                      | 5 min         | 1         |
|    | 1.57               | 380 nm                          | 414/554 nm                      | 60 min        | 2         |
|    | 58                 | 538 nm                          | 570/647 nm                      | 5 min         | 3         |
|   | 0.23               | 425 nm                          | 488/630 nm                      | 30 min        | 4         |
|  | 0.058              | 415 nm                          | 458/605 nm                      | 60 min        | 5         |
|  | 1.76               | 340 nm                          | 575 nm                          | 2 min         | 6         |
|  | 0.1                | 410 nm                          | 530/582 nm                      | 2 min         | 7         |
|  | 2.08               | 515 nm                          | 618 nm                          | 10 min        | This work |

Reference:

1. Z. Chen, F. Z. Chen, Y. C. Sun, H. Liu, H. P. Liu, H. P. He, X. H. Zhang, S. F. Wang, *RSC. Adv.*, 2017, 7, 2573-2577.
2. P. Hou, S. Chen, K. Voitchovsky, X. Z. Song, *Luminescence.*, 2013, 29, 749-753.
3. X. F. Gu, C. H. Liu, Y. C. Zhu, Y. Z. Zhu, *J. Agric. Food. Chem.*, 2011, 59, 11935-11939.
4. Q. Sun, W. B. Zhang, J. H. Qian, *Talanta.*, 2017, 162, 107-113.
5. X. Dai, T. Zhang, Z. F. Du, X. J. Cao, M. Y. Chen, S. W. Hu, J. Y. Miao, B. X. Zhao, *Anal. Chim. Acta.*, 2015, 888, 138-145.
6. J. B. Chao, Y. Zhang, H. F. Wang, Y. B. Zhang, F. J. Huo, C. X. Yin, L. P. Qin, Y. Wang, *Sens. Actuators, B.*, 2013, 188, 200-206.
7. D. P. Li, Z. Y. Wang, X. J. Cao, J. Cui, X. Wang, H. Z. Cui, J. Y. Miao, B. X. Zhao, *Chem. Commun.*, 2016, 52, 2760-2763.

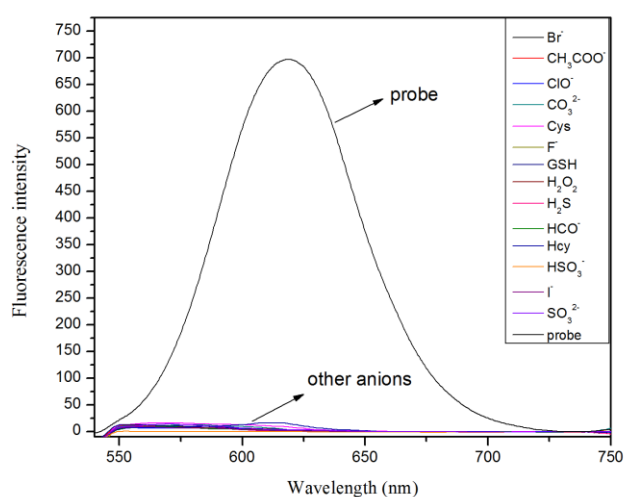

**Fig. S8** Fluorescence responses of probe **PML** (5  $\mu$ M) toward  $\text{HSO}_3^-$  (18 eq.) with different anions.

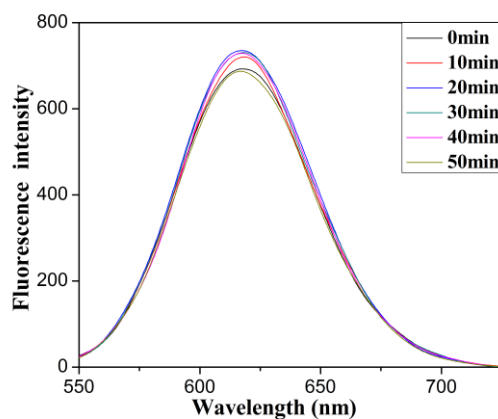

**Fig. S9** The stability of fluorescence probe **PML**.
